# Supplementary material for: Constraints on emissions of carbon monoxide, methane, and a suite of hydrocarbons in the Colorado Front Range using observations of 14 CO 2
Source: Copernicus journal article supplement (doi:10.5194/acp-13-11101-2013), 2013-11-15
Supplement: Supplementary file 1 [file acp-13-11101-2013-supplement.pdf]

**Figure S1:** Mean wind direction for each  $^{14}\text{CO}_2$  sample used in this analysis. Calculated as the mean across the 30 minutes prior to sampling.

**Figure S2.** Mean wind speed for each  $^{14}\text{CO}_2$  sample used in this analysis. Calculated as the mean across the 30 minutes prior to sampling.

**Figures S3-S10:** Shows data used to estimate median tracer/ $\text{CO}_2\text{ff}$  ratios with and without low  $\text{CO}_2\text{ff}$  cutoff (see Sec 2.6 for description) and wind speed (see Sec. 2.1 for description) filters. In all figures, blue data corresponds to S wind sector and red data corresponds to N/E wind sector. See Sec. 2.1 for wind sector definitions. Row 1 (a, d, g, j): wind speed and low  $\text{CO}_2\text{ff}$  cutoff filter; row 2 (b, e, h, k): low  $\text{CO}_2\text{ff}$  cutoff filter only; row 3 (c, f, i, l): wind speed filter only. Column 1 (a-c): time series of individual data points; columns 2 and 3 (d-i): histograms of data in column 1 for N/E (red, d-f) and S (blue, g-i) wind sectors; column 4 (j-l): median tracer/ $\text{CO}_2\text{ff}$  ratios for N/E (red) and S (blue) wind sectors. The data shown in row 1 corresponds to the data used to derive emission ratios and absolute emissions estimates in the manuscript.

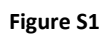

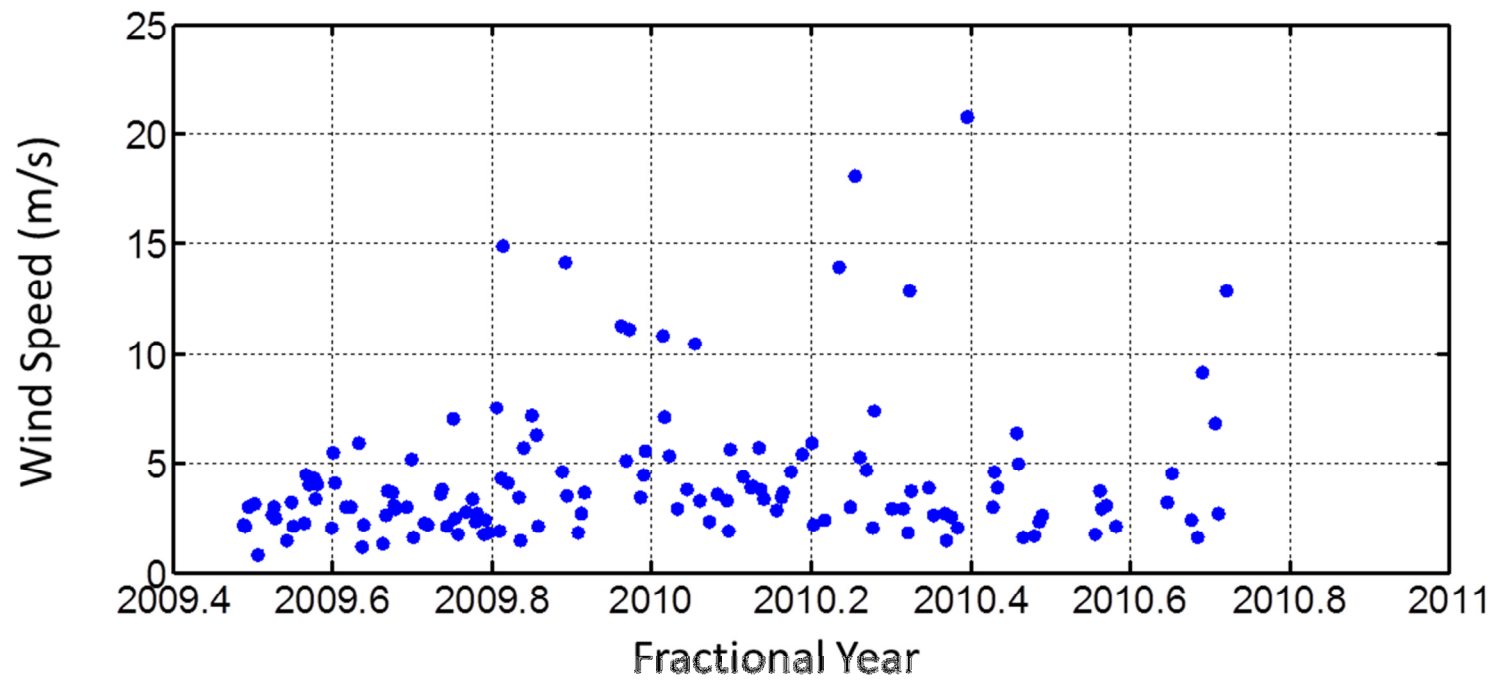

Figure S2

CO/CO<sub>2</sub>ff (ppb/ppm)

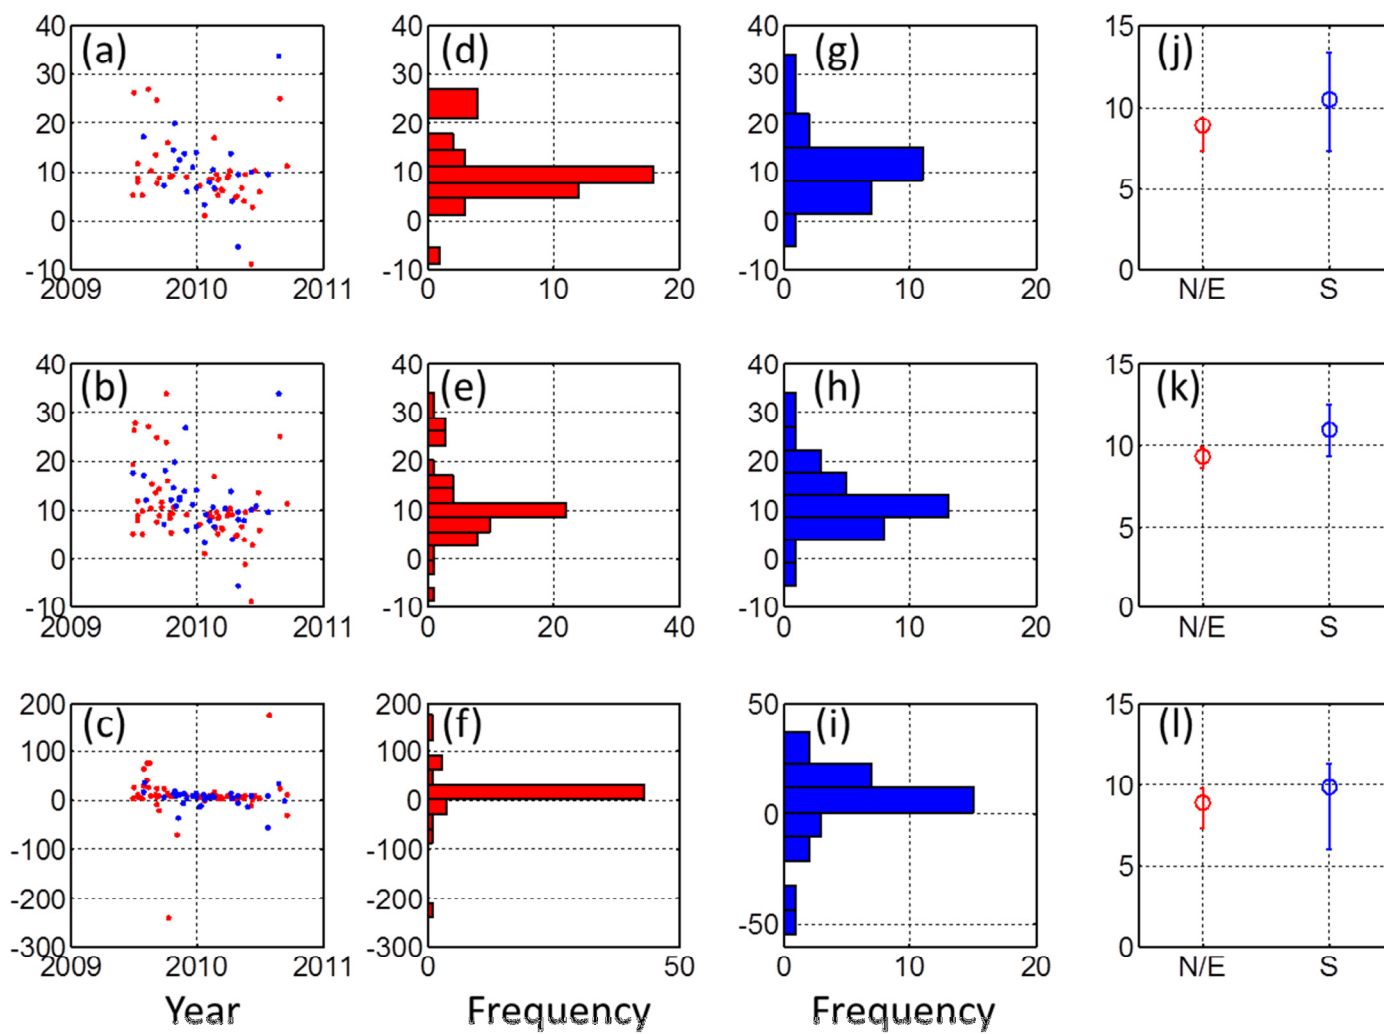

Figure S3 CO/CO<sub>2</sub>ff ratios

$\text{CH}_4/\text{CO}_2\text{ff}$  (ppb/ppm)

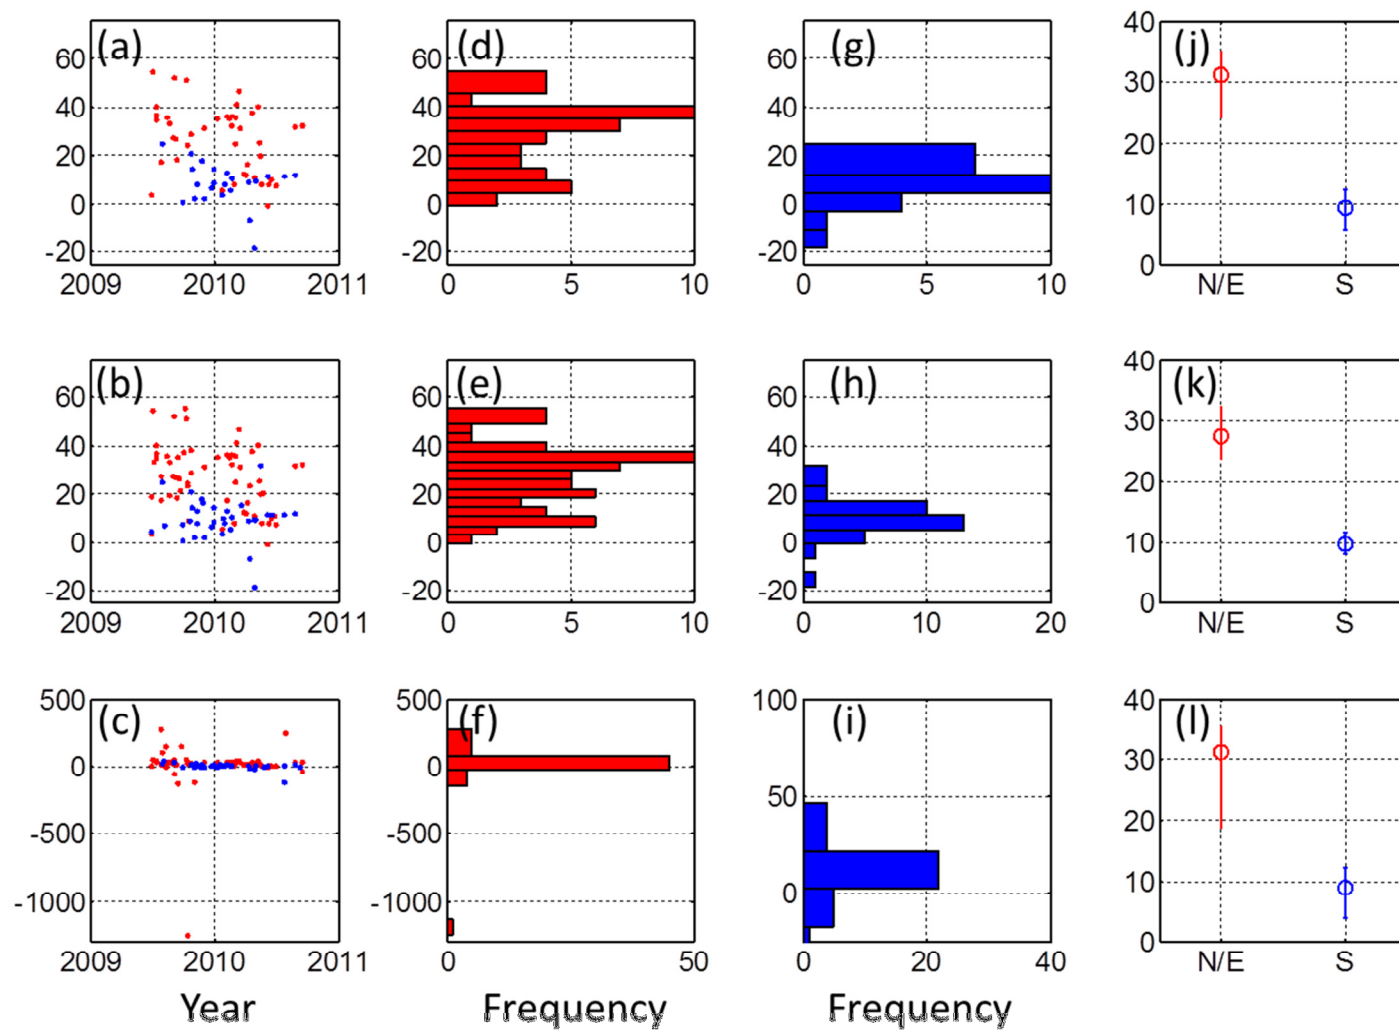

Figure S4  $\text{CH}_4/\text{CO}_2\text{ff}$  ratio

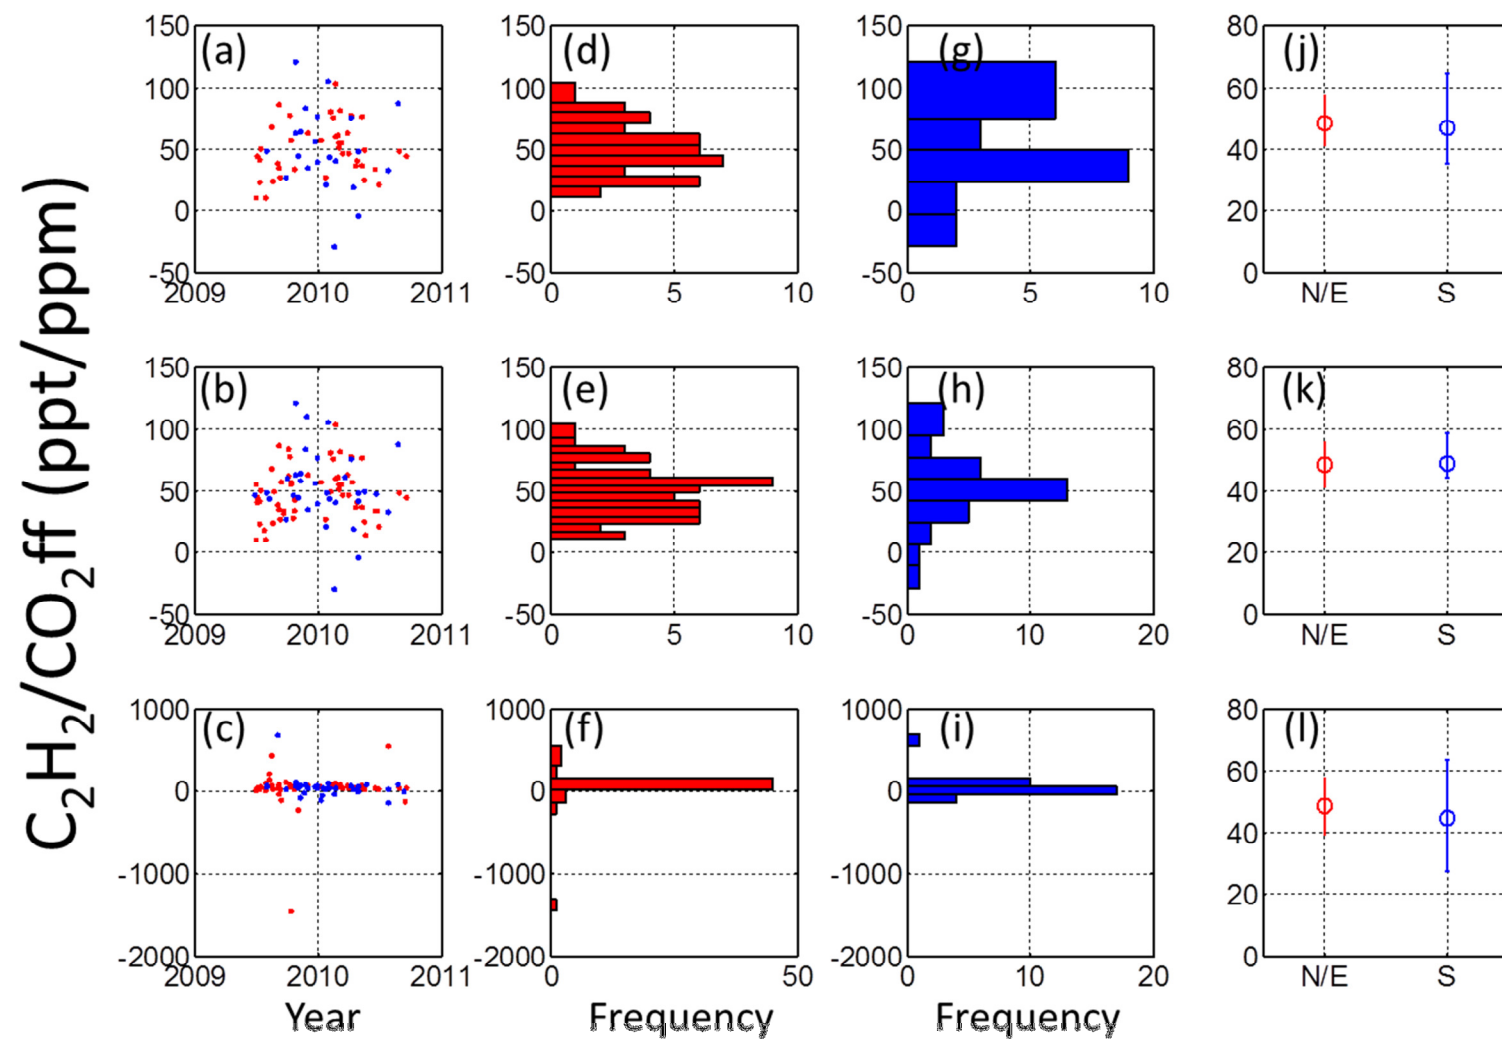

Figure S5  $C_2H_2/CO_2ff$  ratio

$C_6H_6/CO_2ff$  (ppt/ppm)

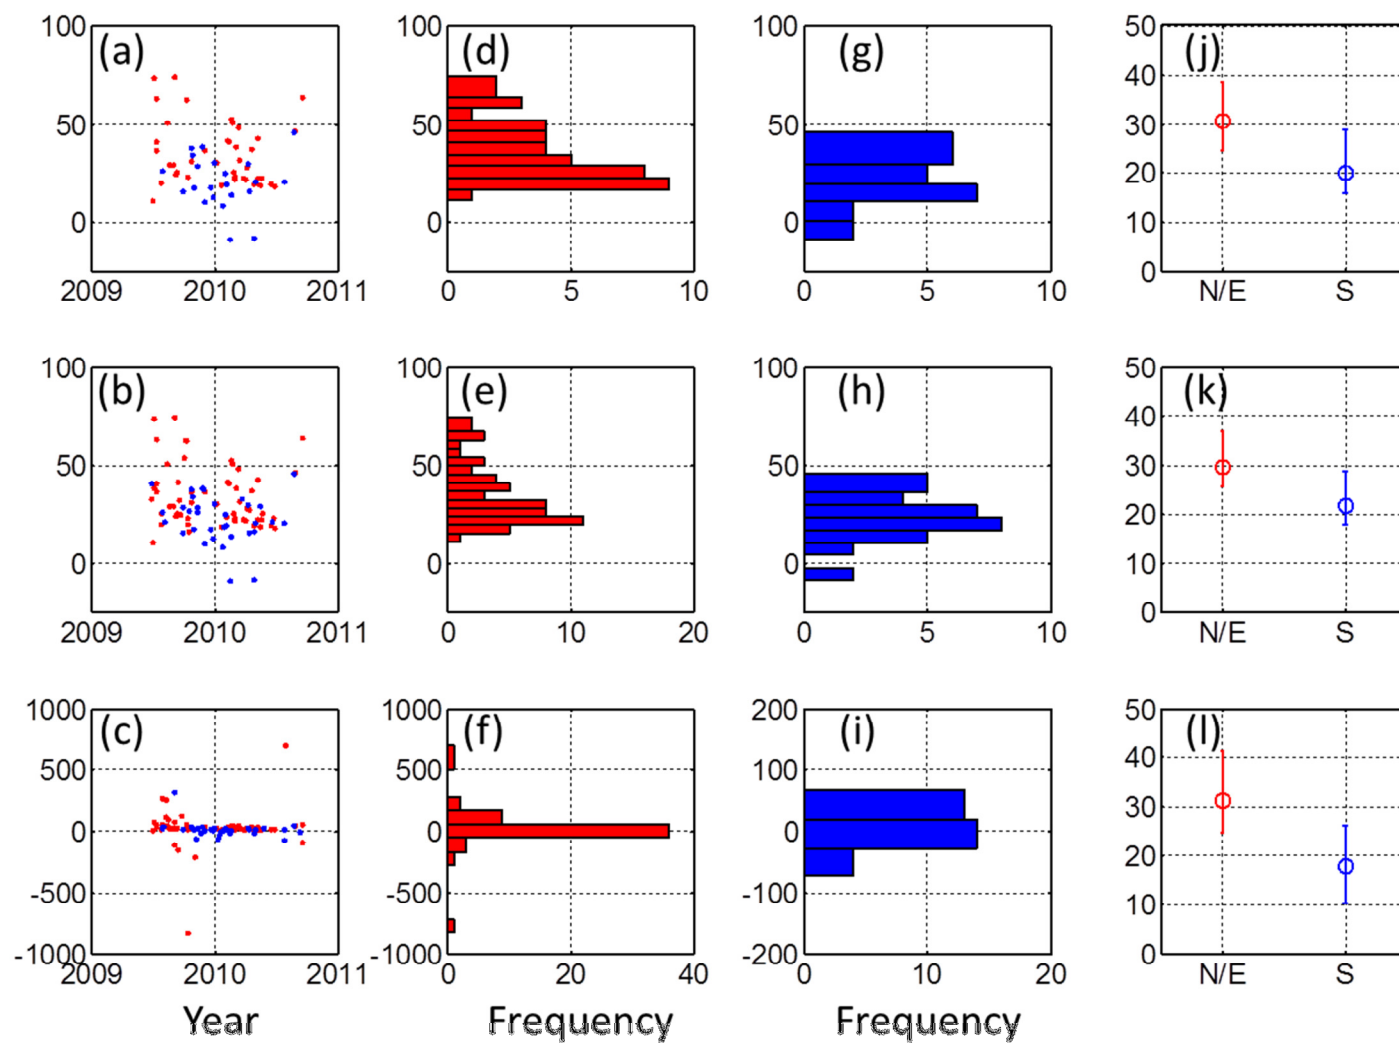

Figure S6  $C_6H_6/CO_2ff$  ratio

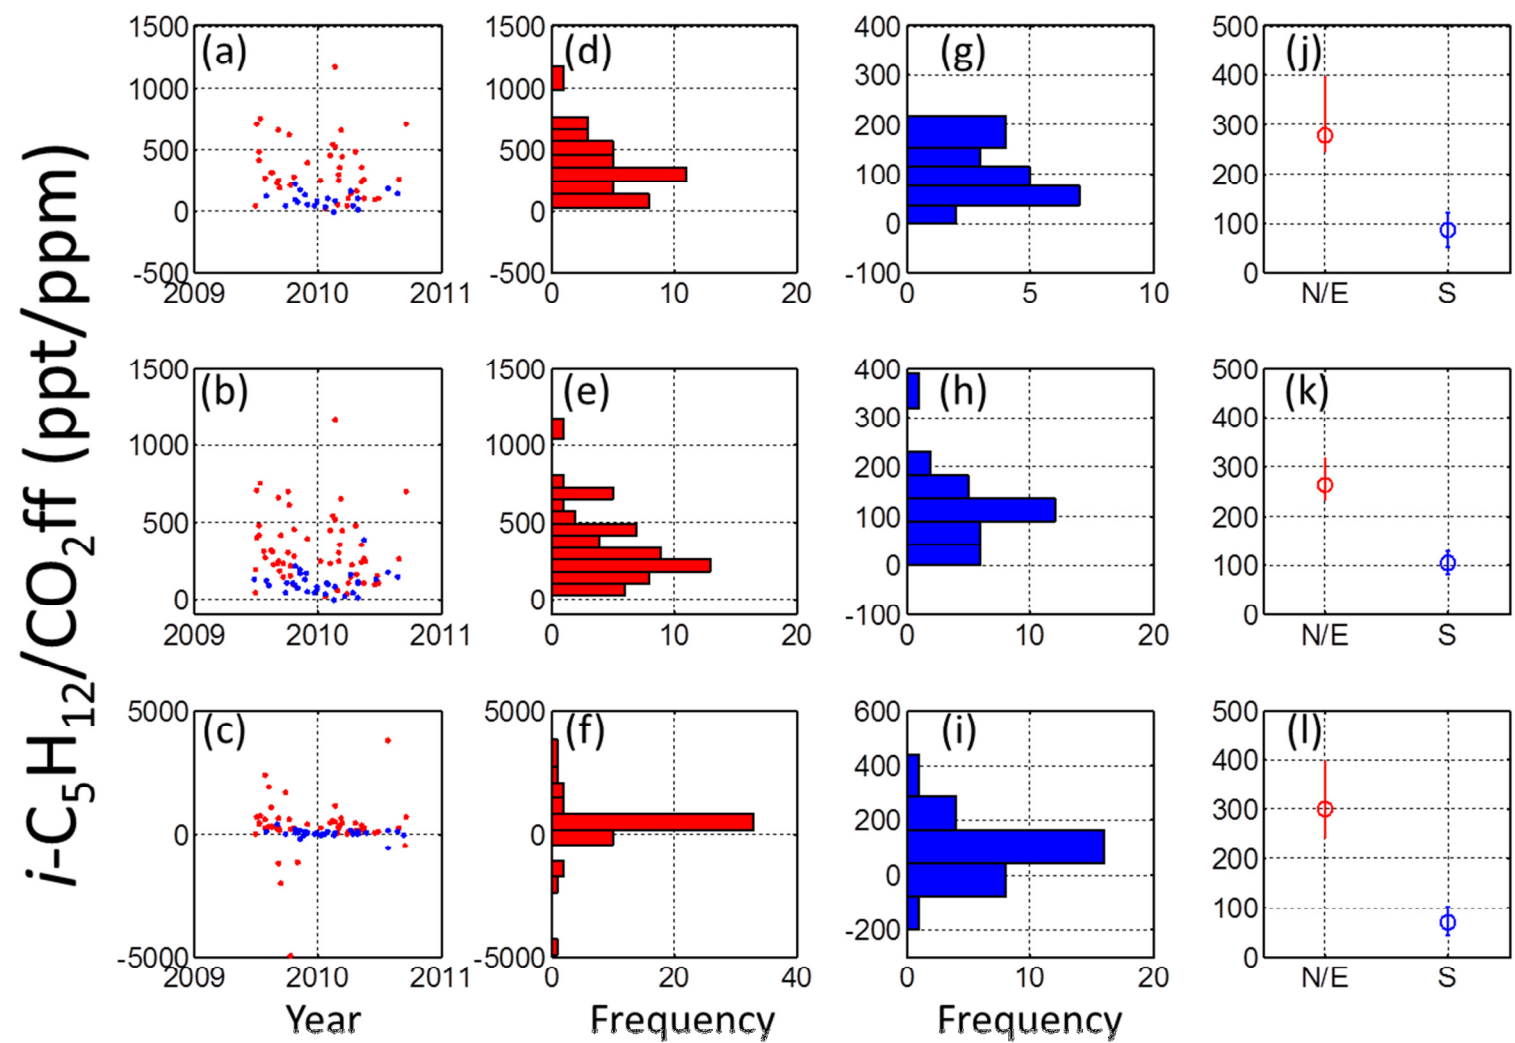

Figure S7  $i\text{-C}_5\text{H}_{12}/\text{CO}_2\text{ff}$  ratio



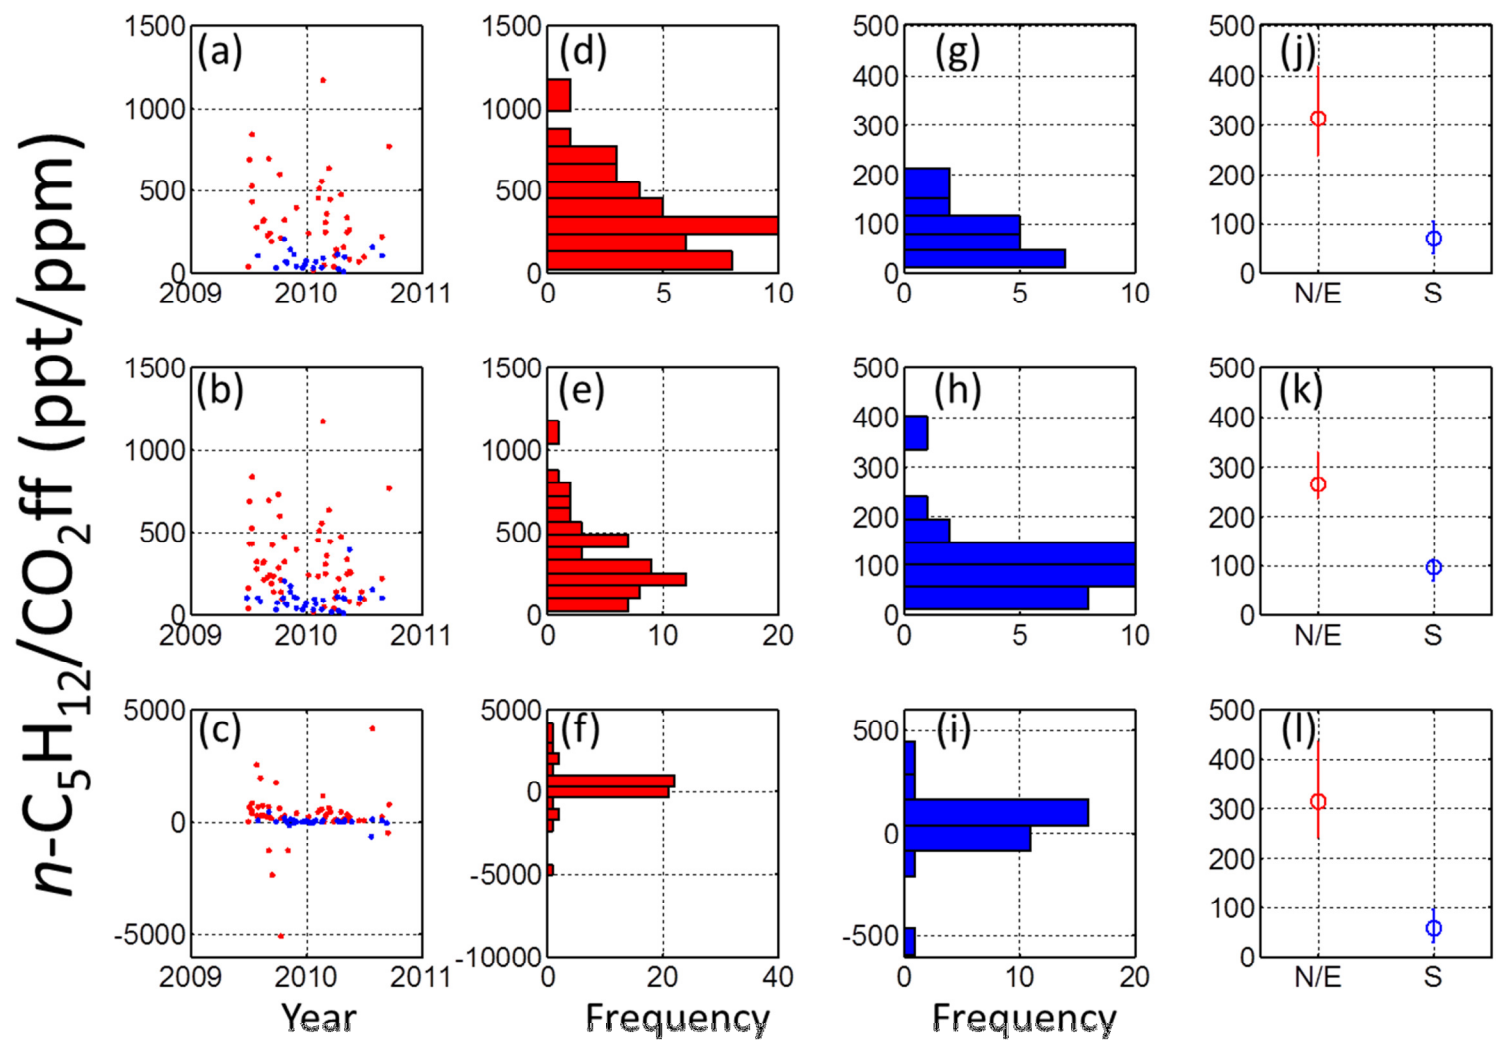

Figure S8  $n\text{-C}_5\text{H}_{12}/\text{CO}_2\text{ff}$  ratio

$n\text{-C}_4\text{H}_{10}/\text{CO}_2\text{ff}$  (ppt/ppm)

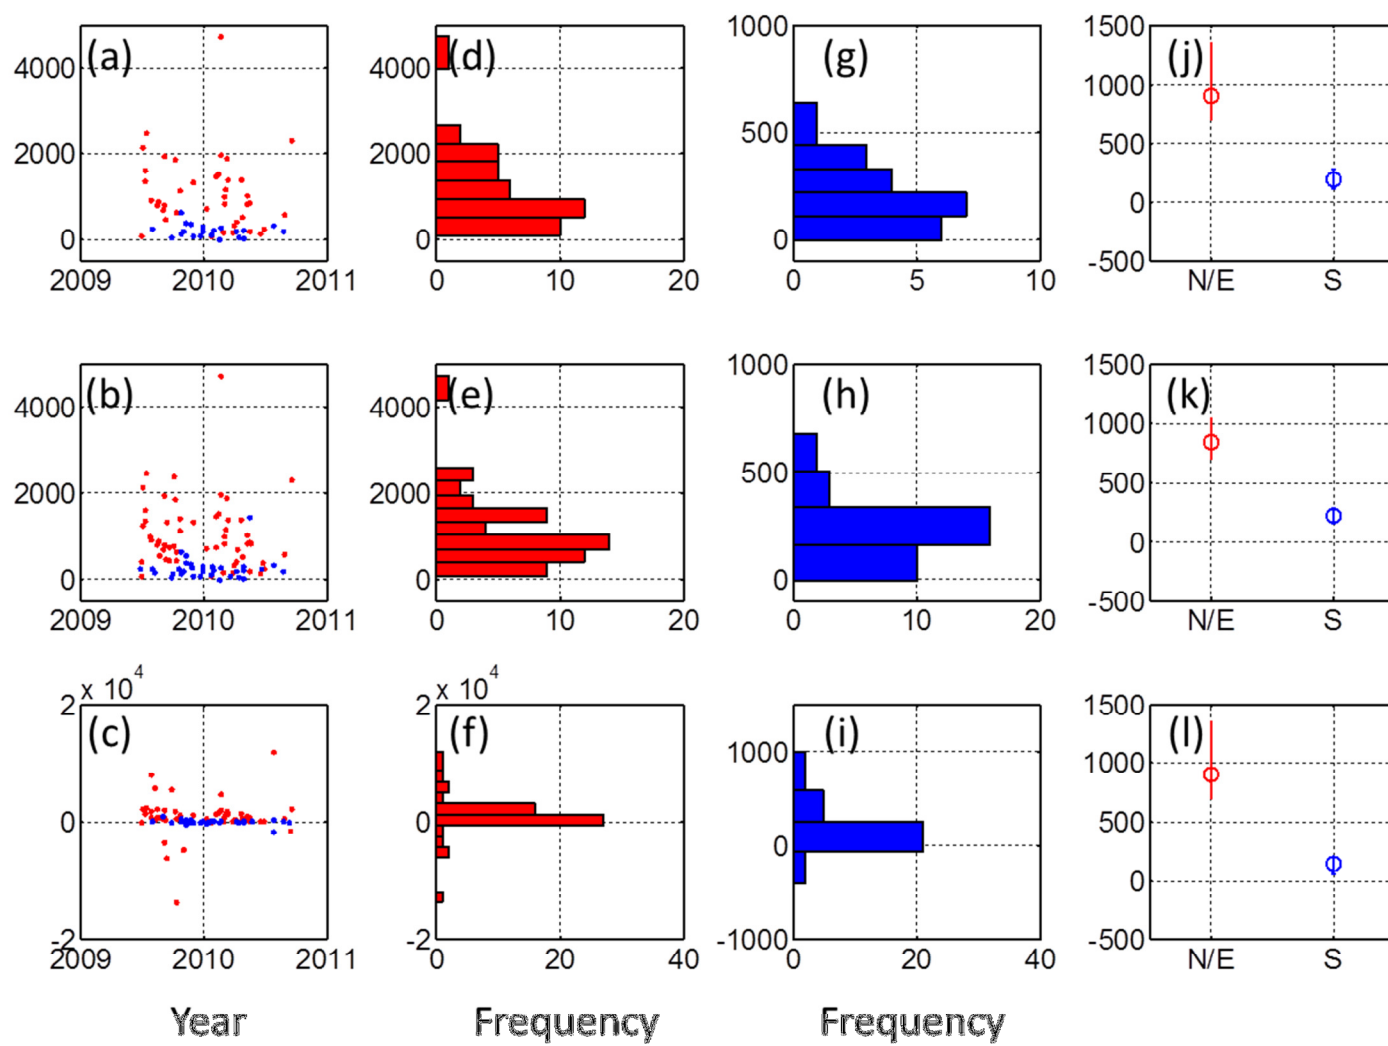

Figure S9  $n\text{-C}_4\text{H}_{10}/\text{CO}_2\text{ff}$  ratio

$C_3H_8/CO_2ff$  (ppt/ppm)

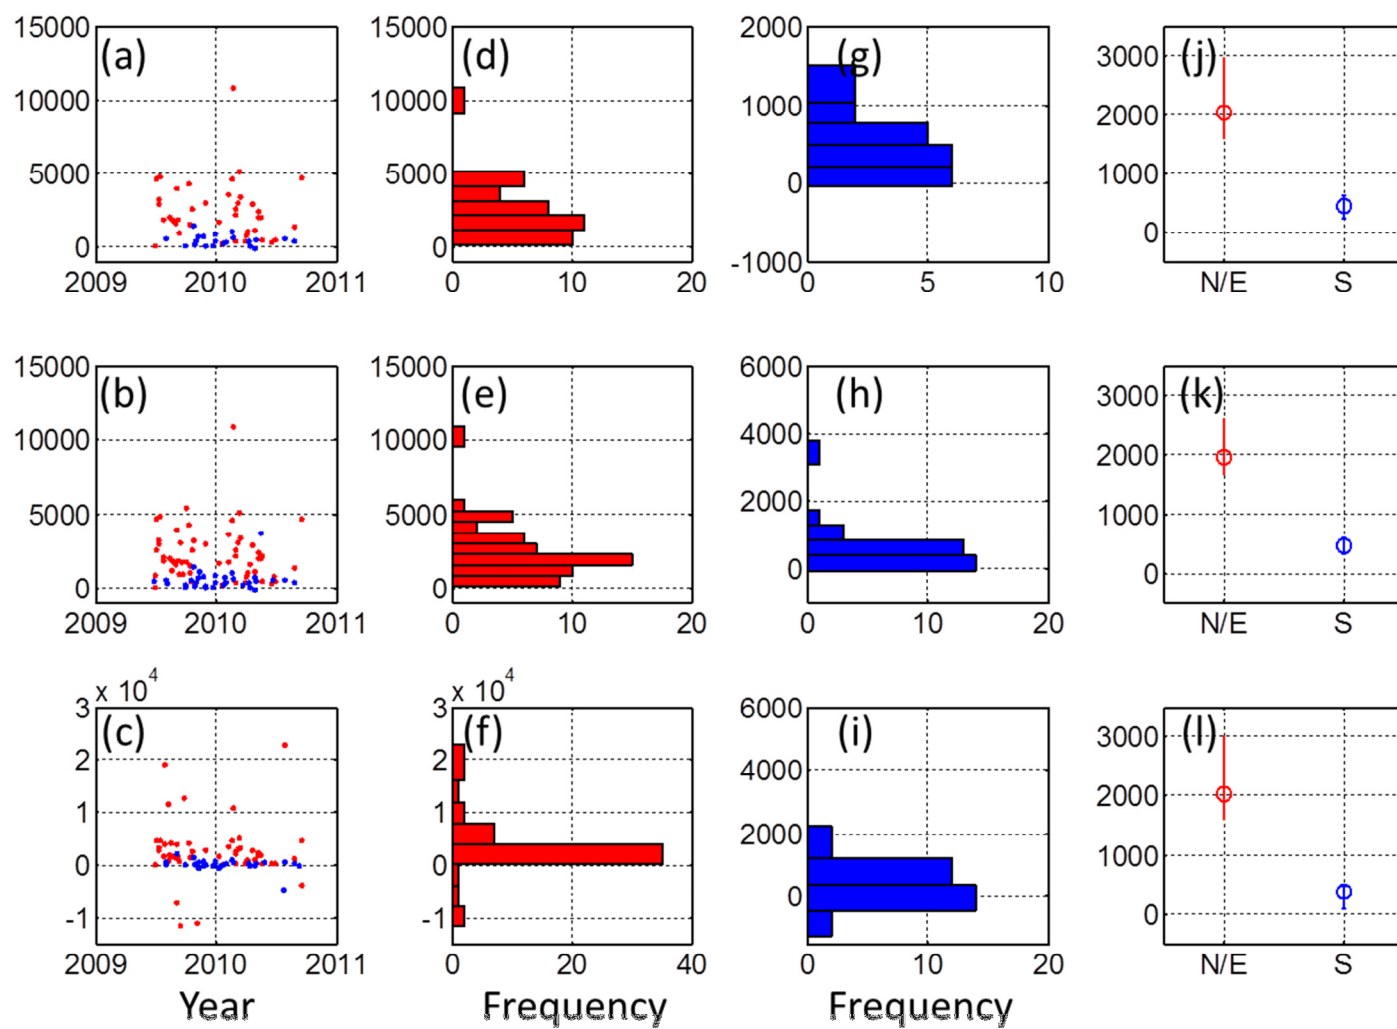

Figure S10  $C_3H_8/CO_2ff$  ratio
